# Supplementary material
Source: MDPI journal article supplement (https://www.mdpi.com/2079-6412/14/3/297)
Supplement: s1 [file s1]

# Effect of Carrier materials for Active Silver in Antibacterial Powder Coatings

Haiping Zhang <sup>1,2</sup>, Jixing Cui <sup>1</sup>, Jiayuan Yang <sup>3</sup>, Hui Yan <sup>1</sup>, Xiping Zhu <sup>4,5</sup>, Yuanyuan Shao <sup>6</sup>,  
Hui Zhang <sup>3,\*</sup> and Jesse Zhu <sup>4</sup>

<sup>1</sup> School of Chemical Engineering and Technology, Tianjin University, Tianjin 300072, China; hpzhang@tju.edu.cn (H.Z.); cuijixing@tju.edu.cn (J.C.); 2020207045@tju.edu.cn (H.Y.)

<sup>2</sup> Zhejiang Institute of Tianjin University, Shaoxing 312300, China

<sup>3</sup> School of Chemical Engineering and Light Industry, Guangdong University of Technology, Guangzhou 510006, China; 2112206088@mail2.gdut.edu.cn

<sup>4</sup> Department of Chemical and Biochemical Engineering, Western University, London, ON N6A 3K7, Canada; xzhu269@uwo.ca (X.Z.); jzhu@uwo.ca (J.Z.)

<sup>5</sup> Wesdon River Powder Paint Scientific Research Co., Ltd., Foshan 528200, China

<sup>6</sup> Nottingham Ningbo China Beacons of Excellence Research and Innovation Institute, The University of Nottingham Ningbo China, Ningbo 315100, China; yuanyuan.shao@nottingham.edu.cn

\* Correspondence: hzhang1@uwo.ca

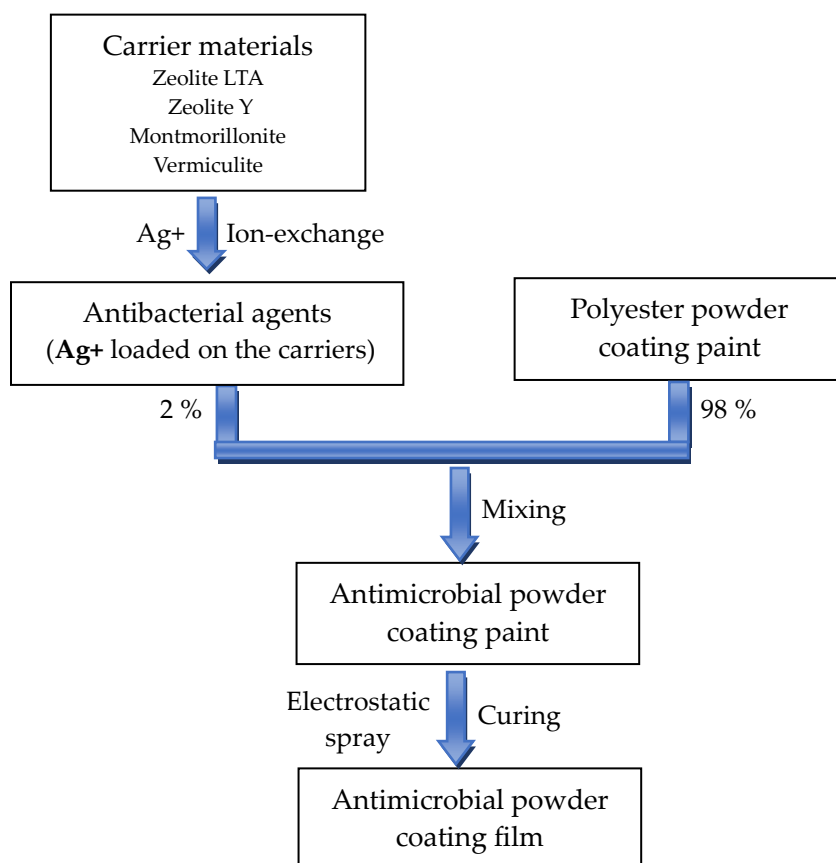

Figure S1 The process of preparation of antimicrobial coating film

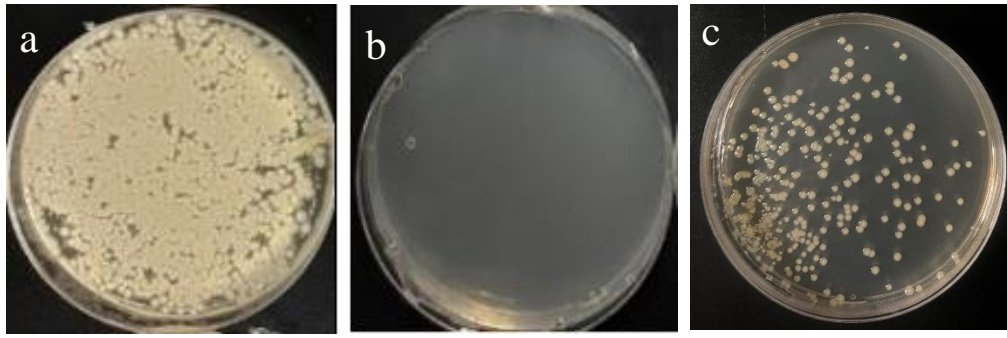

Figure S2 The image of *E. coli* after treated with antibacterial coatings (diluted by 1000 times) a: coating without antibacterial agents; b: coating with Ag-LTA; c: coating with Ag-V

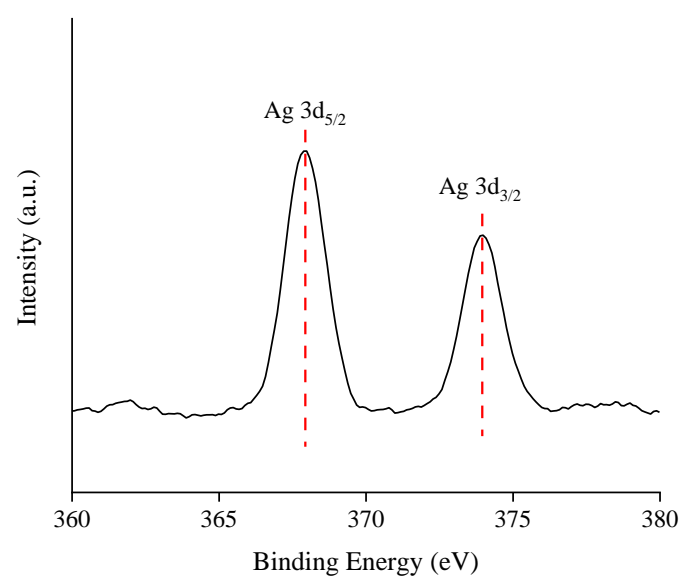

Figure S3 XPS spectrum the Ag 3d region of Ag-LTA

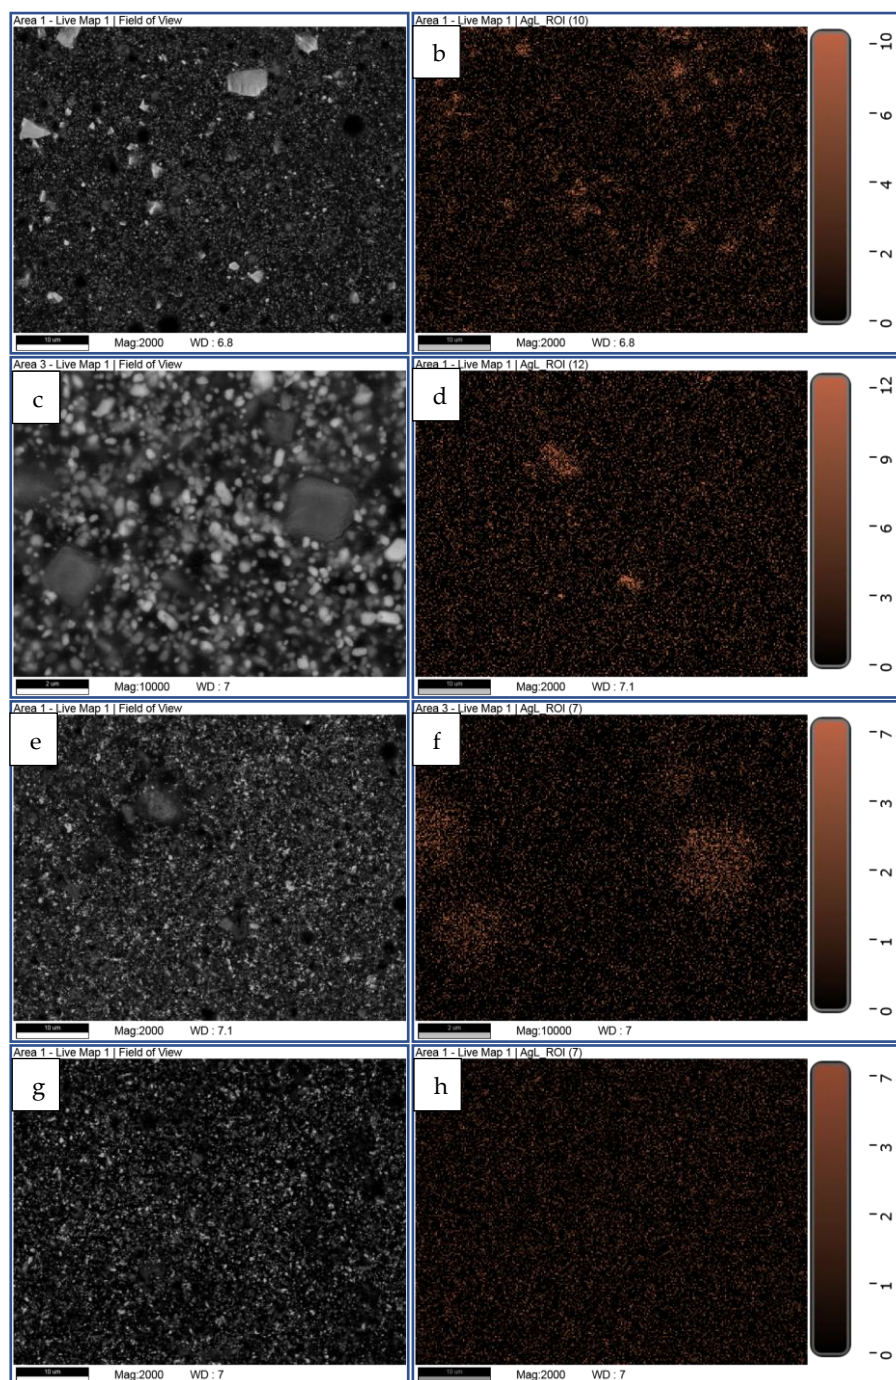

Figure S4 SEM images and EDS mapping (element Ag) of antimicrobial coatings with different agents:  
a, b, Ag-LTA; c, d, Ag-Y; e, f, Ag-M; g, h, Ag-V
